# Supplementary material for: Mild dealumination of template-stabilized zeolites by NH4F
Source: Royal Society of Chemistry journal article supplement (doi:10.1039/c9cy00593e), 2019-01-01
Supplement: c9cy00593e1.pdf [file c9cy00593e1.pdf]

## Supporting information for

### **Mild dealumination of template-stabilized zeolites by $\text{NH}_4\text{F}$**

Aleksei Bolshakov, Nikolay Kosinov, Douglas E. Romero Hidalgo, Brahim Mezari, Arno J.F.  
van Hoof and Emiel J.M. Hensen\*

Laboratory of Inorganic Materials and Catalysis, Schuit Institute of Catalysis, Department of  
Chemical Engineering and Chemistry, Eindhoven University of Technology, P.O. Box 513,  
5600 MB Eindhoven, The Netherlands

Corresponding authors:

Nikolay Kosinov

Tel: +31-40-2478156

Email: [n.a.kosinov@tue.nl](mailto:n.a.kosinov@tue.nl)

Emiel J.M. Hensen

Tel: +31-40-2475178

Email: [e.j.m.hensen@tue.nl](mailto:e.j.m.hensen@tue.nl)

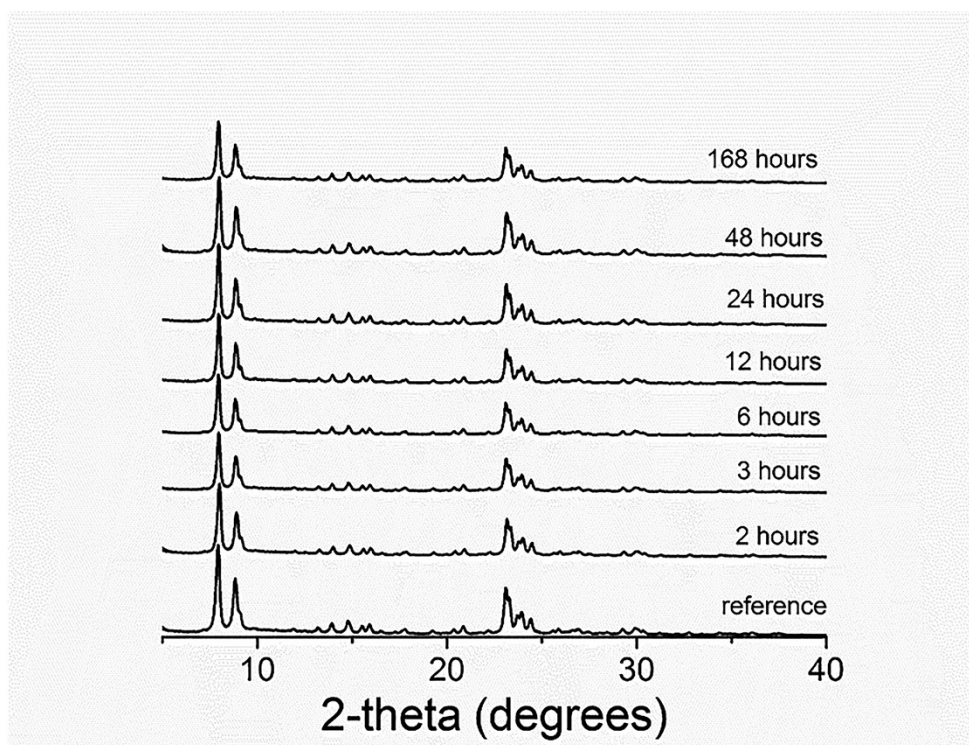

**Figure S1.** XRD patterns of reference ZSM-5 and ZSM-5 treated by  $\text{NH}_4\text{F}$  for different periods of time. Treatment conditions: 175 °C, 1 M  $\text{NH}_4\text{F}$ .

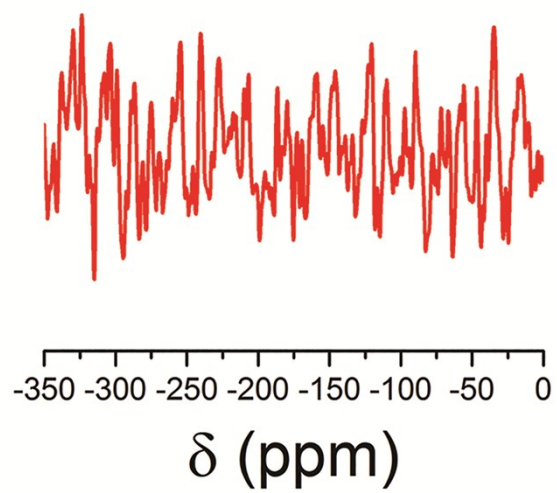

**Figure S2.**  $^{19}\text{F}$  NMR spectrum of  $\text{NH}_4\text{F}$  treated and calcined ZSM-5 crystals. Treatment conditions: 175 °C, 6 h, 1 M  $\text{NH}_4\text{F}$ .

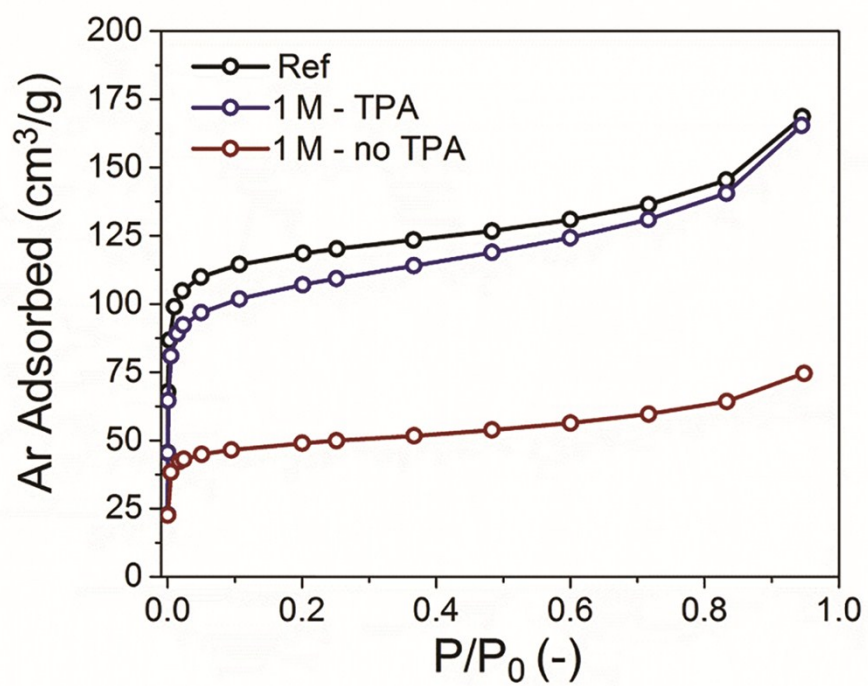

**Figure S3.** Ar adsorption isotherms of parent MFI-TPA sample (black), MFI-TPA (blue) and calcined MFI (red) samples after  $\text{NH}_4\text{F}$  treatment. Treatment conditions: 1 M  $\text{NH}_4\text{F}$ , 175 °C, 6 h.

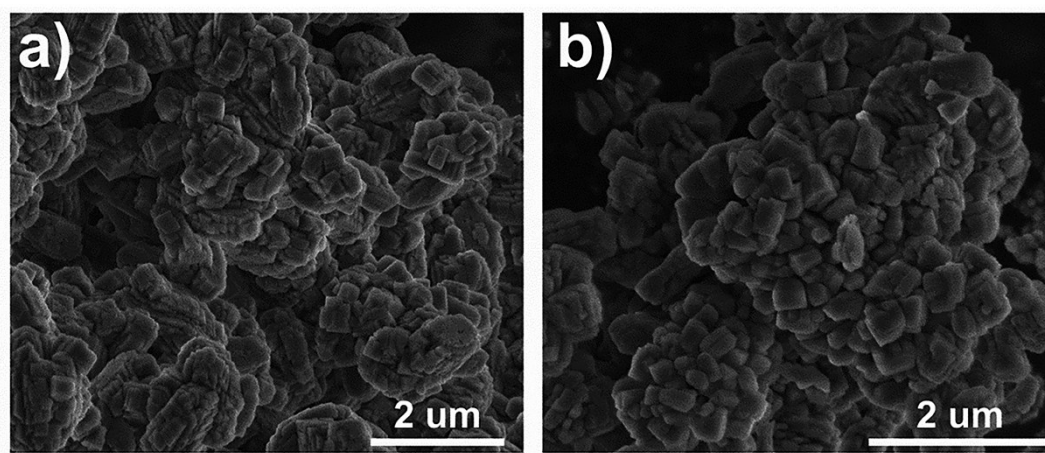

**Figure S4.** SEM images of MFI-PET samples before (a) and after (b)  $\text{NH}_4\text{F}$  treatment. Treatment conditions:  $175\text{ }^\circ\text{C}$ , 6 h, 1 M  $\text{NH}_4\text{F}$ .

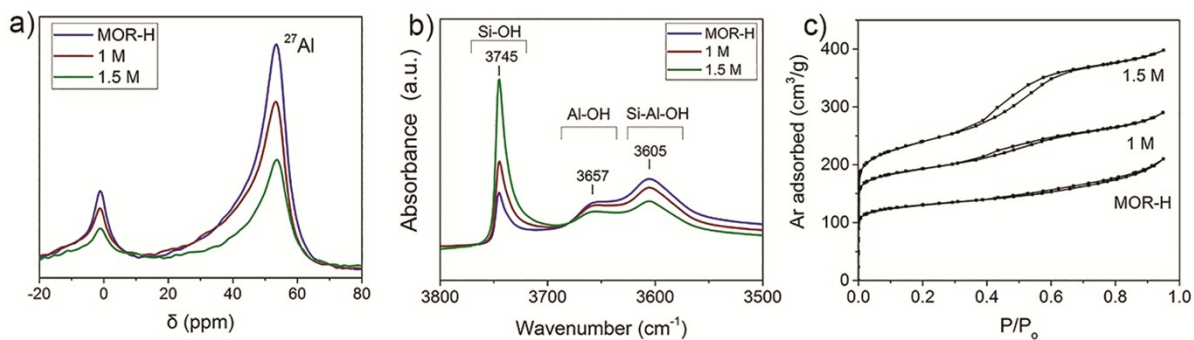

**Figure S5.**  $^{27}\text{Al}$  NMR spectra (a), weight normalized transmission FTIR spectra (b) and Ar adsorption analysis of the MOR samples treated in  $\text{NH}_4\text{F}$  solution with varying concentrations (c). The isotherms are offset for clarity by  $50 \text{ cm}^3/\text{g}$ . Treatment conditions:  $175 \text{ }^\circ\text{C}$ , 2 h

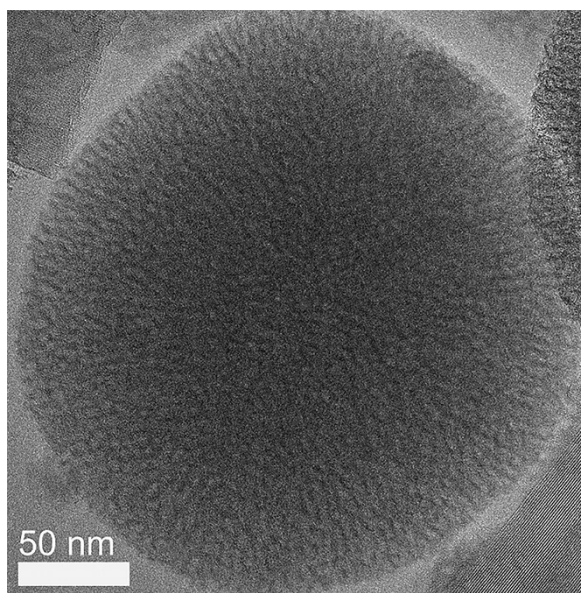

**Figure S6.** TEM image of the second phase of MOR-H sample detected after  $\text{NH}_4\text{F}$  treatment. Treatment conditions:  $175 \text{ }^\circ\text{C}$ , 2 h, 1.5 M  $\text{NH}_4\text{F}$ .

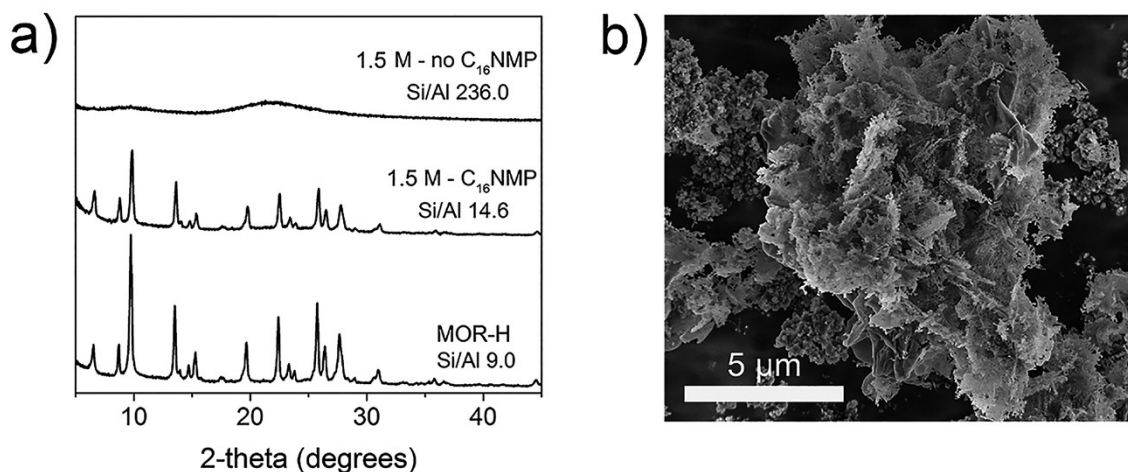

**Fig**

**ure S7.** XRD patterns and Si/Al ratios of the MOR zeolites before and after  $\text{NH}_4\text{F}$  treatment (a), SEM image of MOR crystals after calcination on air and  $\text{NH}_4\text{F}$  treatment (b). Treatment conditions: 175 °C, 2 h, 1.5 M  $\text{NH}_4\text{F}$ .

**Table S1.** Results of hydrothermal treatment with varying concentration of  $\text{NH}_4\text{F}$  at 175 °C and 2 h reaction time.

| $\text{NH}_4\text{F}$<br>Treatment    | Si/Al,<br>ICP | FAI<br>removed<br>NMR, % | EFAI<br>NMR, % | BET<br>surface<br>area,<br>$\text{m}^2/\text{g}$ | External<br>surface<br>area, $\text{m}^2/\text{g}$ | $V_{\text{micro}}$ ,<br>$\text{cm}^3/\text{g}$<br>( <i>NLDFT</i> ) | $V_{\text{meso}}$ ,<br>$\text{cm}^3/\text{g}$<br>( <i>BJH</i> ) |
|---------------------------------------|---------------|--------------------------|----------------|--------------------------------------------------|----------------------------------------------------|--------------------------------------------------------------------|-----------------------------------------------------------------|
| MOR-H                                 | $9.0 \pm 2$   | 0                        | 23.8           | 408                                              | 99                                                 | 0.17                                                               | 0.14                                                            |
| 1 M                                   | $10.7 \pm 2$  | 24                       | 24.8           | 413                                              | 240                                                | 0.16                                                               | 0.20                                                            |
| 1.5 M<br>$\text{C}_{16}\text{NMP}$    | $14.6 \pm 2$  | 50                       | 26.9           | 426                                              | 505                                                | 0.13                                                               | 0.35                                                            |
| 1.5 M no<br>$\text{C}_{16}\text{NMP}$ | $236.0 \pm 2$ | -                        | -              | 26                                               | 29                                                 | -                                                                  | 0.05                                                            |

**Table S2.** Acidic properties of the MOR-H before and after the treatment with 1 M and 1.5 M of  $\text{NH}_4\text{F}$  solution determined by IR spectroscopy of adsorbed pyridine and  $\text{H}_2$  chemisorption. Treatment conditions: 175 °C, 2 h.

| Zeolite | BAS, ( $\text{mmol g}^{-1}$ ) |        |        | LAS, ( $\text{mmol g}^{-1}$ ) |        |        | $n\text{Pd}/n\text{H}^{+ \text{ a,b}}$ |
|---------|-------------------------------|--------|--------|-------------------------------|--------|--------|----------------------------------------|
|         | 150 °C                        | 300 °C | 500 °C | 150 °C                        | 300 °C | 500 °C |                                        |
| MOR-H   | 0.67                          | 0.57   | 0.31   | 0.15                          | 0.13   | 0.15   | 0.19                                   |
| 1 M     | 0.58                          | 0.50   | 0.28   | 0.20                          | 0.16   | 0.14   | 0.16                                   |
| 1.5 M   | 0.41                          | 0.35   | 0.18   | 0.20                          | 0.16   | 0.16   | 0.25                                   |

<sup>a</sup> Pd active sites determined by  $\text{H}_2$  chemisorption

<sup>b</sup>  $\text{H}^+$  determined from the concentration of BAS at 500 °C
